# Supplementary material
Source: PubMed Central journal article supplement (PMC8020835)

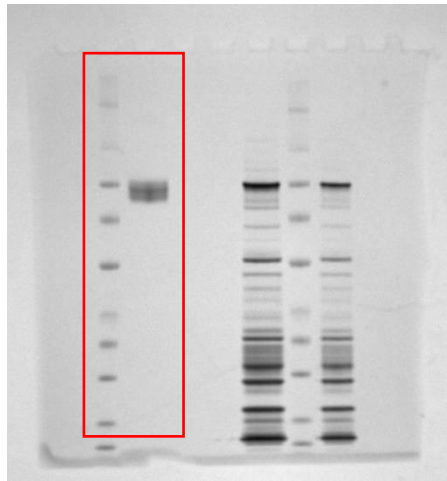

**Supplementary Fig. 1 | Uncropped gel used for Extended Data Fig. 1f.** The cropping box is shown in red.

Supplement: NIHMS1582966-supplement-1582966_Supp_Fig1.pdf [file NIHMS1582966-supplement-1582966_Supp_Fig1.pdf]
